# Supplementary material for: Food-derived polyphenols inhibit the growth of ovarian cancer cells irrespective of their ability to induce antioxidant responses
Source: PubMed Central journal article supplement (PMC6121158; doi:10.1016/j.heliyon.2018.e00753), 2018-08-29

Figure 3

Left panel

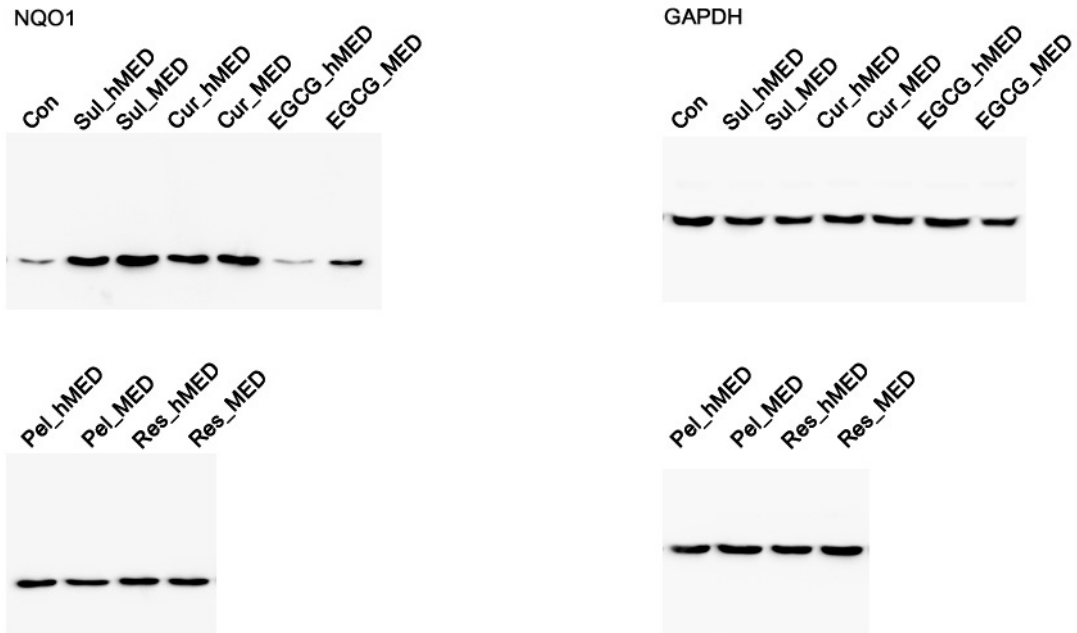

Right panel

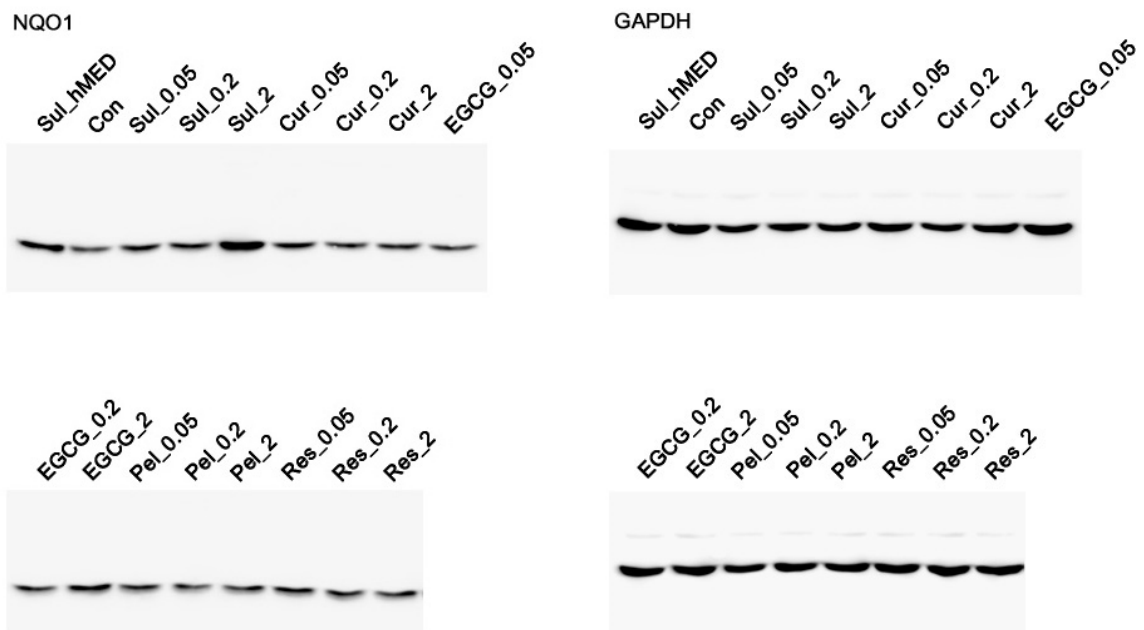

Figure 4

p-p38

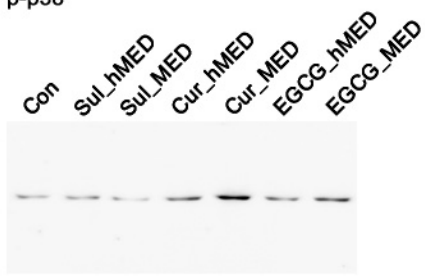

p38

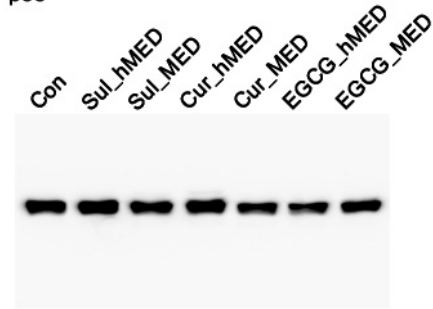

p-ERK

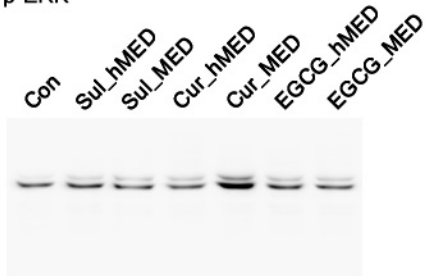

ERK

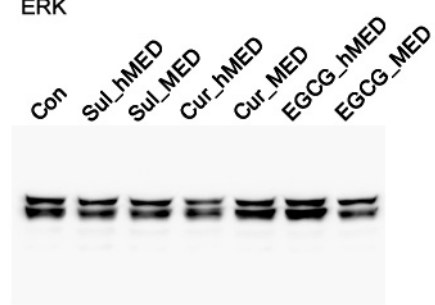

p-JNK

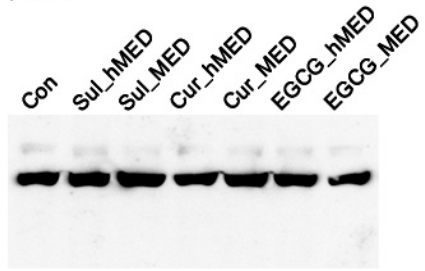

JNK

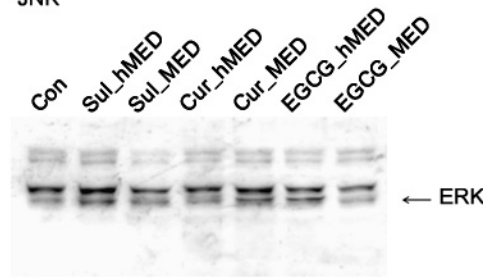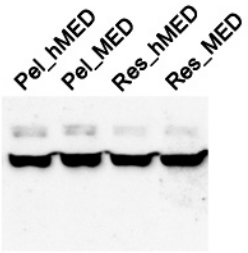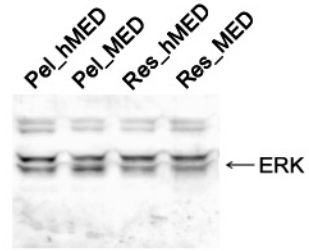

GAPDH

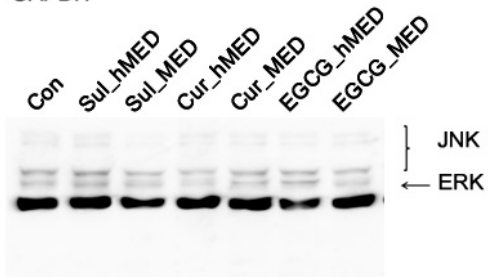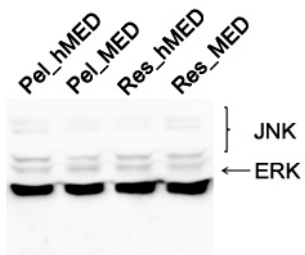

Figure 6

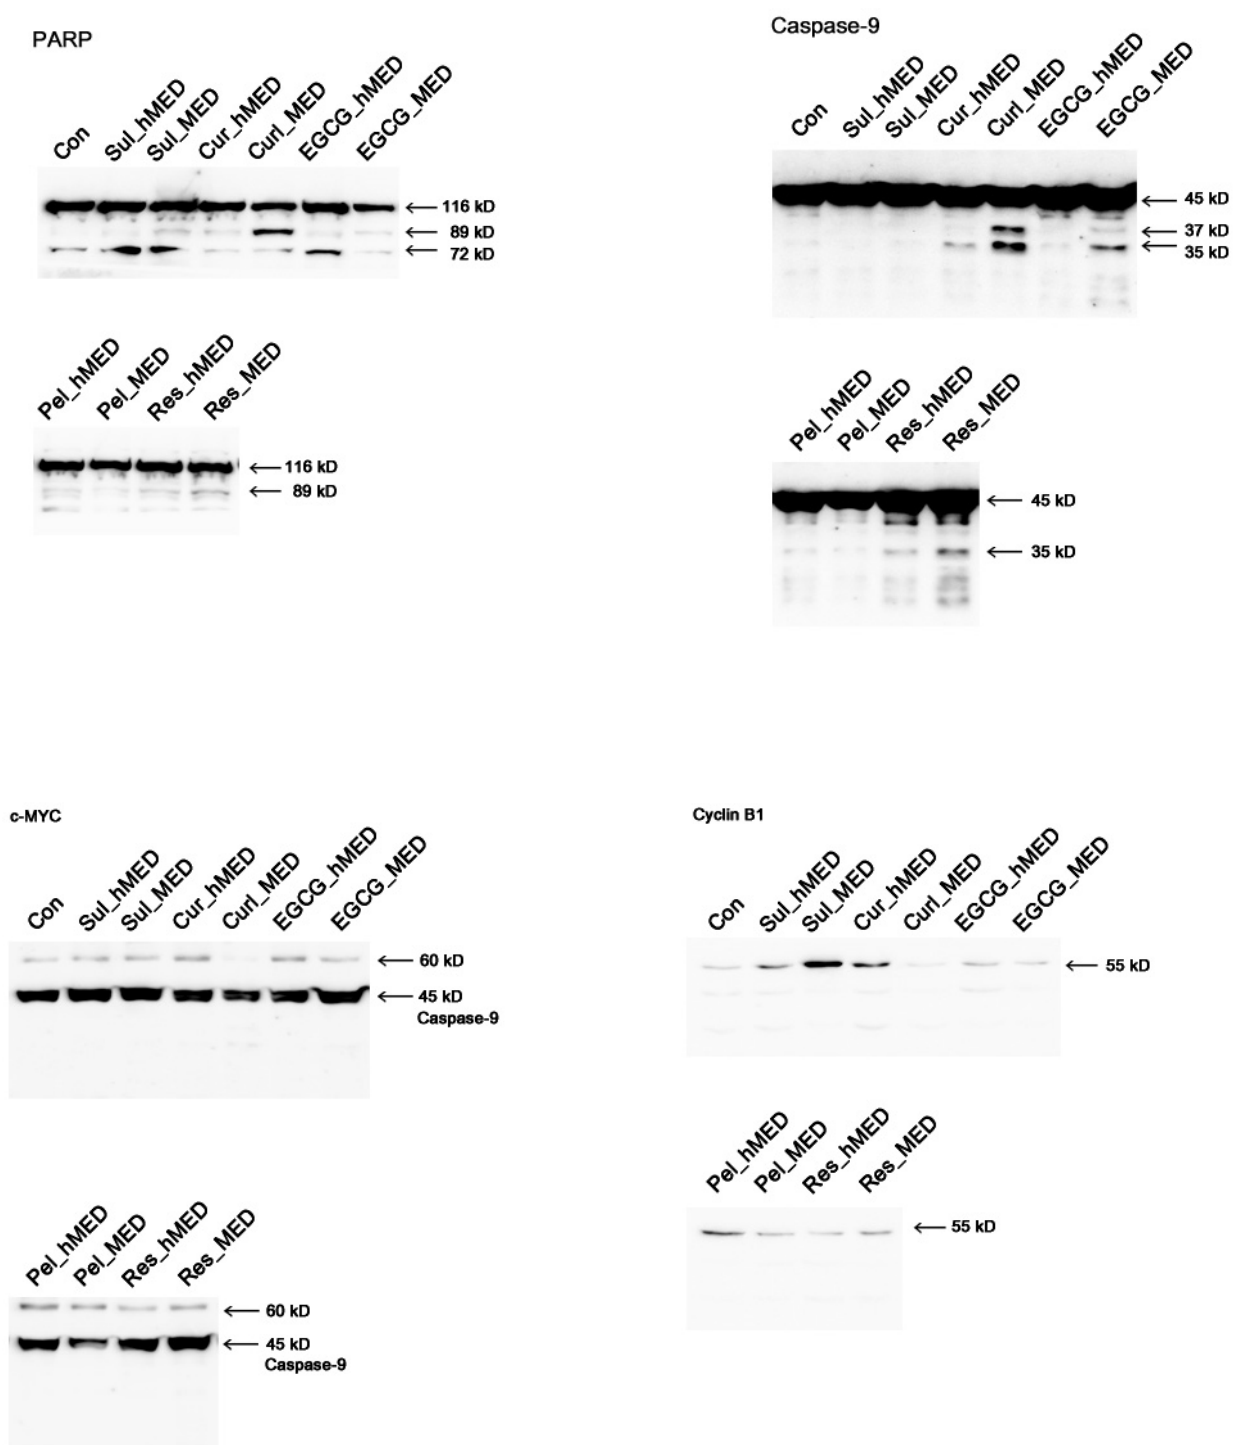

Cyclin D1

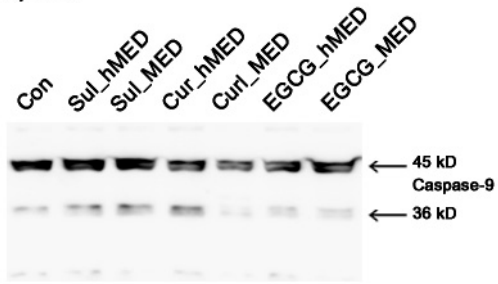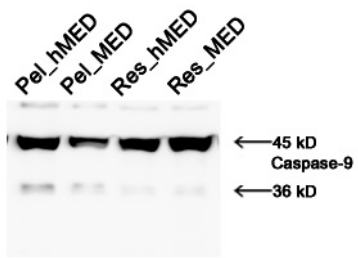

Cyclin E1

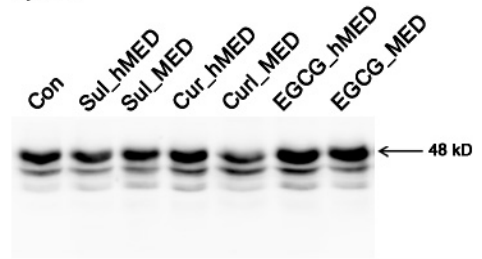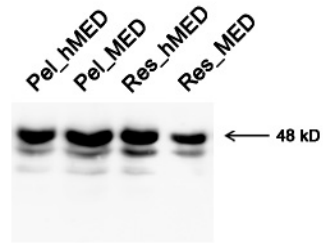

GAPDH

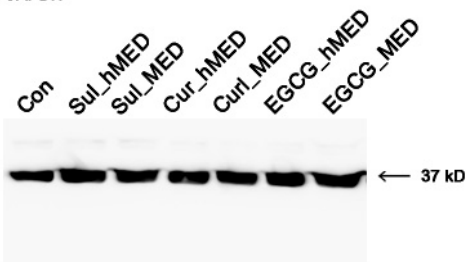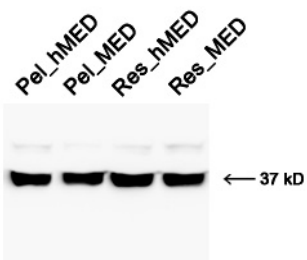

Supplement: mmc1.pdf [file mmc1.pdf]
